# Supplementary material
Source: MDPI journal article supplement (https://www.mdpi.com/2071-1050/11/18/4819)
Supplement: s1 [file s1]

# Is prolonging the lifetime of passive durable products a low hanging fruit of a circular economy? A multiple case study

Mohamad Kaddoura<sup>a,1</sup> (corresponding author)

Marianna Lena Kambanou<sup>b</sup> (email: [marianna.kambanou@liu.se](mailto:marianna.kambanou@liu.se))

Anne-Marie Tillman<sup>a</sup> (email: [anne-marie.tillman@chalmers.se](mailto:anne-marie.tillman@chalmers.se))

Tomohiko Sakao<sup>b</sup> (email: [tomohiko.sakao@liu.se](mailto:tomohiko.sakao@liu.se))

<sup>a</sup>Division of Environmental System Analysis, Department of Technology Management and Economics, Chalmers University of Technology, SE-412 96, Gothenburg, Sweden

<sup>b</sup>Division of Environmental Technology and Management, Department of Management and Engineering, Linköping University, SE-581 83, Linköping, Sweden

## Supplementary Information

This document contains the detailed lifecycle inventory data used in the LCA, and the assumptions done in the sensitivity analysis. The data used for the LCC is deemed confidential by the companies, and thus cannot be shared. The document also includes the datasets used to model different materials/processes. The last section contains the results for the life cycle impact assessment.

The repair/refurbish phase was mainly cleaning with water, production of spare parts (which the inventory data of is already mentioned in the BOM), and collection and redistribution distances (also similar to distribution distances). Thus, this phase is not repeated again here.

---

<sup>1</sup> Present address: CIRAIG, Department of Chemical Engineering, École Polytechnique de Montréal, P.O. Box 6079, Succ. Centre-ville, Montréal, Québec, H3C 3A7, Canada. Email: [mohamad.kaddoura@polymtl.ca](mailto:mohamad.kaddoura@polymtl.ca)

## Table of Contents

|                                                            |           |
|------------------------------------------------------------|-----------|
| <b>Supplementary Information .....</b>                     | <b>1</b>  |
| <b>1 Bill of material and inbound transportation .....</b> | <b>3</b>  |
| <b>2 Manufacturing data.....</b>                           | <b>8</b>  |
| <b>3 Distribution.....</b>                                 | <b>9</b>  |
| <b>4 End of life.....</b>                                  | <b>10</b> |
| <b>5 Life Cycle Impact Assessment Results.....</b>         | <b>11</b> |
| <b>6 Bibliography .....</b>                                | <b>13</b> |

## 1 Bill of material and inbound transportation

Tables S1-5 include an overview of the bill of material of the five products, represented per functional unit. They also show the datasets used in modelling the materials.

*Table S1 Overview of materials used and upstream logistics for the beach flag.*

| Beach flag   |             |             |                                                                                                           |                         |                |                                                                                                                     |
|--------------|-------------|-------------|-----------------------------------------------------------------------------------------------------------|-------------------------|----------------|---------------------------------------------------------------------------------------------------------------------|
| Component    | Material    | weight (kg) | Dataset used                                                                                              | Transport distance (km) | Transport mode | Dataset used                                                                                                        |
| Pole         | Fiber glass | 1.5         | glass fibre production   glass fibre   APOS, S – RoW (ecoinvent)                                          | 23000                   | Ship           | transport, freight, sea, transoceanic ship   transport, freight, sea, transoceanic ship   APOS, S – GLO (ecoinvent) |
| Textile      | Polyester   | 0.125       | (Roos et al., 2015)                                                                                       |                         |                |                                                                                                                     |
| Bag for pole |             | 0.5         |                                                                                                           |                         |                |                                                                                                                     |
| Cross base   | Steel       | 4           | steel production, converter, chromium steel 18/8   steel, chromium steel 18/8   APOS, S – RoW (ecoinvent) |                         |                |                                                                                                                     |

Table S2 Overview of materials used and upstream logistics for the event tent.

| Event tent    |           |             |                                                                                                           |                         |                |                                                                                                                     |
|---------------|-----------|-------------|-----------------------------------------------------------------------------------------------------------|-------------------------|----------------|---------------------------------------------------------------------------------------------------------------------|
| Component     | Material  | weight (kg) | Dataset used                                                                                              | Transport distance (km) | Transport mode | Dataset used                                                                                                        |
| Frame         | Aluminum  | 29          | market for aluminium, cast alloy   aluminium, cast alloy   APOS, S – GLO (ecoinvent)                      | 23000                   | Ship           | transport, freight, sea, transoceanic ship   transport, freight, sea, transoceanic ship   APOS, S – GLO (ecoinvent) |
| Frame weights | Steel     | 60          | steel production, converter, chromium steel 18/8   steel, chromium steel 18/8   APOS, S – RoW (ecoinvent) |                         |                |                                                                                                                     |
| Textile       | Polyester | 15          | (Roos et al., 2015)                                                                                       |                         |                |                                                                                                                     |

Table S3 Overview of materials used and upstream logistics for the recycling bin

| Recycling bin |                  |             |                                                                                                           |                         |                  |                                                                                                                                                |
|---------------|------------------|-------------|-----------------------------------------------------------------------------------------------------------|-------------------------|------------------|------------------------------------------------------------------------------------------------------------------------------------------------|
| Component     | Material         | weight (kg) | Dataset used                                                                                              | Transport distance (km) | Transport mode   | Dataset used                                                                                                                                   |
| body          | Steel            | 37.12       | steel production, converter, chromium steel 18/8   steel, chromium steel 18/8   APOS, S – RER (ecoinvent) | 405                     | train            | transport, freight train, electricity   transport, freight train   APOS, S - Europe without Switzerland (ecoinvent)                            |
|               |                  | 9.28        | steel production, low-alloyed, hot rolled   steel, low-alloyed, hot rolled   APOS, S – RER (ecoinvent)    |                         |                  |                                                                                                                                                |
| Body coating  | Powder coating   | 0.8         | coating powder production   coating powder   APOS, S – RER (ecoinvent)                                    | 100                     | LCV <sup>2</sup> | Transport, freight, light commercial vehicle   transport, freight, light commercial vehicle   APOS, S - Europe without Switzerland (ecoinvent) |
| Lid           | MDF <sup>3</sup> | 4.4         | medium density fibre board production, uncoated   medium density fibreboard   APOS, S – RER (ecoinvent)   | 1000                    | lorry            | transport, freight, lorry 16-32 metric ton, EURO5   transport, freight, lorry 16-32 metric ton, EURO5   APOS, S – RER (ecoinvent)              |
| Lid coating   | foil             | 0.4         | (Gislaved-Folie-AB, 2018)                                                                                 | 100                     | LCV              | Transport, freight, light commercial vehicle   transport, freight, light commercial vehicle   APOS, S - Europe without Switzerland (ecoinvent) |

<sup>2</sup> Light commercial vehicle

<sup>3</sup> Medium Density Fiberboard, with a density of 770 kg/m<sup>3</sup>, imported from Romania

Table S4 Overview of materials used and upstream logistics for the storage locker

| Storage locker     |                |             |                                                                                                                                                                                                       |                         |                |                                                                                                                                                |
|--------------------|----------------|-------------|-------------------------------------------------------------------------------------------------------------------------------------------------------------------------------------------------------|-------------------------|----------------|------------------------------------------------------------------------------------------------------------------------------------------------|
| Component          | Material       | weight (kg) | Dataset used                                                                                                                                                                                          | Transport distance (km) | Transport mode | Dataset used                                                                                                                                   |
| Body <sup>4</sup>  | Particle board | 169.2       | particle board production, for indoor use   particle board, for indoor use   APOS, S – RER (ecoinvent)                                                                                                | 559                     | lorry          | transport, freight, lorry 16-32 metric ton, EURO5   transport, freight, lorry 16-32 metric ton, EURO5   APOS, S – RER (ecoinvent)              |
| Body cover         | Veneer         | 8.9         | market for sawlog and veneer log, hardwood, measured as solid wood under bark   sawlog and veneer log, hardwood, measured as solid wood under bark   APOS, S - Europe without Switzerland (ecoinvent) |                         |                |                                                                                                                                                |
| Door paint         | paint          | 10.8        | alkyd paint production, white, water-based, product in 60% solution state   alkyd paint, white, without water, in 60% solution state   APOS, S – RER (ecoinvent)                                      | 100                     |                |                                                                                                                                                |
| Glue               | Glue           | 0.34        | epoxy resin production, liquid   epoxy resin, liquid   APOS, S – RER (ecoinvent)                                                                                                                      | 100                     | LCV            | Transport, freight, light commercial vehicle   transport, freight, light commercial vehicle   APOS, S - Europe without Switzerland (ecoinvent) |
| Lockers and hinges | steel          | 10          | steel production, converter, chromium steel 18/8   steel, chromium steel 18/8   APOS, S – RER (ecoinvent)                                                                                             |                         |                |                                                                                                                                                |

<sup>4</sup> The particle board has a density 746 kg/m<sup>3</sup>, imported from Latvia. It is assumed that it is covered with a 1 mm layer of veneer

Table S5 Overview of materials used and upstream logistics for the waste inlet. For the circular offering, the weight is represented between parenthesis for the door.

| Waste inlet                  |                   |             |                                                                                                           |                         |                |                                                                                                                     |
|------------------------------|-------------------|-------------|-----------------------------------------------------------------------------------------------------------|-------------------------|----------------|---------------------------------------------------------------------------------------------------------------------|
| Component                    | Material          | weight (kg) | Dataset used                                                                                              | Transport distance (km) | Transport mode | Dataset used                                                                                                        |
| Inlet (upper and lower part) | Steel             | 679.85      | steel production, low-alloyed, hot rolled   steel, low-alloyed, hot rolled   APOS, S – RER (ecoinvent)    | 500                     | train          | transport, freight train, electricity   transport, freight train   APOS, S - Europe without Switzerland (ecoinvent) |
|                              | Zinc coating      | 7.88        | zinc coating, pieces   zinc coat, pieces   APOS, S - RER (ecoinvent)                                      |                         |                |                                                                                                                     |
|                              | powder coating    | 1.66        | coating powder production   coating powder   APOS, S – RER (ecoinvent)                                    |                         |                |                                                                                                                     |
|                              | EPDM <sup>5</sup> | 3.38        | synthetic rubber production   synthetic rubber   APOS, S – RER (ecoinvent)                                |                         |                |                                                                                                                     |
| Door                         |                   | 0.11 (0)    |                                                                                                           |                         |                |                                                                                                                     |
|                              | Steel             | 0.1 (0.58)  | steel production, converter, chromium steel 18/8   steel, chromium steel 18/8   APOS, S – RER (ecoinvent) |                         |                |                                                                                                                     |
|                              | PEHD <sup>6</sup> | 0 (0.01)    | Polyethylene high density granulate (PE-HD), production mix, at plant – RER (ecoinvent)                   |                         |                |                                                                                                                     |
|                              | Aluminum          | 2.58 (2.64) | market for aluminium, cast alloy   aluminium, cast alloy   APOS, S – GLO (ecoinvent)                      |                         |                |                                                                                                                     |
| Door handle                  |                   | 0 (0.34)    |                                                                                                           |                         |                |                                                                                                                     |

<sup>5</sup> Ethylene Propylene Diene Monomer rubber

<sup>6</sup> Polyethylene, High Density

## 2 Manufacturing data

Table S6 includes the processes used for the manufacturing of the five products. All datasets used are from the ecoinvent 3.3 database.

*Table S6 Overview of the manufacturing processes of the five products*

| Product        | Process           | Amount  | Dataset used                                                                                          |
|----------------|-------------------|---------|-------------------------------------------------------------------------------------------------------|
| Beach flag     | Electricity       | 50 MJ   | market group for electricity, low voltage   electricity, low voltage   APOS, S - CN                   |
| Event tent     |                   | 50 MJ   |                                                                                                       |
| Recycling bin  |                   | 288 MJ  | market for electricity, low voltage   electricity, low voltage   APOS, S - SE                         |
| Storage locker |                   | 57.6 MJ |                                                                                                       |
| Waste inlet    | Aluminum drilling | 0.03 kg | aluminium drilling, conventional   aluminium removed by drilling, conventional   APOS, U <sup>7</sup> |
|                | Steel drilling    | 7 kg    | steel drilling, conventional   steel removed by drilling, conventional   APOS, U <sup>8</sup>         |

---

<sup>7</sup> This process was edited by removing “aluminium, cast alloy” and “aluminium, wrought alloy” flows from the input, since it is already accounted for in the input, and to avoid double counting.

<sup>8</sup> This process was edited by removing “steel, low-alloyed, hot rolled” flow from the input, since it is already accounted for in the input, and to avoid double counting.



### 3 Distribution

The distribution of the different products is summarized in table S7. All datasets used are from the ecoinvent 3.3 database.

*Table S7 Overview of the distribution modes and distances for different products*

| Product        | Transport distance (km) | Transport mode           | Dataset used                                                                                                                       |
|----------------|-------------------------|--------------------------|------------------------------------------------------------------------------------------------------------------------------------|
| Beach flag     | 200                     | Light commercial vehicle | Transport, freight, light commercial vehicle   transport, freight, light commercial vehicle   APOS, S - Europe without Switzerland |
| Event tent     | 200                     | Light commercial vehicle | Transport, freight, light commercial vehicle   transport, freight, light commercial vehicle   APOS, S - Europe without Switzerland |
| Recycling bin  | 356                     | lorry                    | transport, freight, lorry 7.5-16 metric ton, EURO6   transport, freight, lorry 7.5-16 metric ton, EURO6   APOS, S - RER            |
| Storage locker | 356                     | lorry                    | transport, freight, lorry 7.5-16 metric ton, EURO6   transport, freight, lorry 7.5-16 metric ton, EURO6   APOS, S - RER            |
| Waste Inlet    | 62                      | lorry                    | transport, freight, lorry 3.5-7.5 metric ton, EURO6   transport, freight, lorry 3.5-7.5 metric ton, EURO6   APOS, S - RER          |

## 4 End of life

Since the cut-off method was used for the end-of-life, the recycling of the metals at the final use is not modelled. Non-metal parts (textile, fiberglass, and wood) is sent into incineration with energy recovery. The burden of incineration was modelled, without giving credit to the energy recovery. All the EOL transports are assumed to be carried by a lorry (“transport, freight, lorry 3.5-7.5 metric ton, EURO6 | transport, freight, lorry 3.5-7.5 metric ton, EURO6 | APOS, S – RER” was used from ecoinvent) for a distance of 100 km. Table S8 shows the datasets used for different incineration processes, some are adjusted to include only the burden without the credit.

*Table S8 Overview of the incineration processes used at the end-of-life*

| Process                               | Dataset used                                                                                                                                                                                  | DataBase          |
|---------------------------------------|-----------------------------------------------------------------------------------------------------------------------------------------------------------------------------------------------|-------------------|
| <b>Textile incineration burden</b>    | Waste incineration of textile fraction in municipal solid waste (MSW), at plant, average European waste-to-energy plant, without collection, transport and pre-treatment - EU-27 <sup>9</sup> | ELCD (ELCD, 2012) |
| <b>Wood incineration burden</b>       | heat and power co-generation, wood chips, 6667 kW, state-of-the-art 2014   heat, district or industrial, other than natural gas   APOS, U - SE <sup>10</sup>                                  | Ecoinvent 3.3     |
| <b>Fiberglass incineration burden</b> | treatment of waste glass, municipal incineration   waste glass   APOS, U - Europe without Switzerland                                                                                         | Ecoinvent 3.3     |

---

<sup>9</sup> This process was edited by removing the “process steam from waste incineration” and the “electricity from waste incineration” flows from the output, to exclude the credits of incineration.

<sup>10</sup> This process was edited by removing the “heat, district or industrial, other than natural gas” flow from the output, to exclude the credits of incineration.

## 5 Life Cycle Impact Assessment Results

Table S9 summarizes the results of the LCIA for both the BAU offering and the circular offerings (between parenthesis).

Table S9 Overview of the LCIA results for the various products

| Impact Category                                                                     | Beach flag         | Event tent         | Recycle bin       | storage locker     | Waste inlet          |
|-------------------------------------------------------------------------------------|--------------------|--------------------|-------------------|--------------------|----------------------|
| <b>Acidification potential (kg SO<sub>2</sub> eq/functional unit)</b>               | 0.27<br>(0.07)     | 5.65<br>(2.89)     | 1.38<br>(0.73)    | 2.03<br>(1.32)     | 11.49<br>(11.23)     |
| <b>Global warming potential (kg CO<sub>2</sub> eq/functional unit)</b>              | 41.59<br>(11.51)   | 869.32<br>(477.86) | 234.9<br>(124.02) | 189.95<br>(118.34) | 2786.61<br>(2748.36) |
| <b>Eutrophication potential (kg SO<sub>4</sub><sup>3-</sup> eq functional unit)</b> | 0.06<br>(0.02)     | 1.39<br>(0.6)      | 0.4<br>(0.21)     | 0.57<br>(0.35)     | 5.73<br>(5.64)       |
| <b>Ozone depletion potential (kg CFC-11 eq functional unit)</b>                     | 2.3E-5<br>(6.9E-6) | 5.7E-4<br>(5.2E-4) | 1.8E-5<br>(1E-5)  | 4.6E-5<br>(2.6E-5) | 3E-4<br>(2.9E-4)     |
| <b>Iron, 46% in ore (kg/functional unit)</b>                                        | 4.74<br>(0.56)     | 74.76<br>(10.19)   | 48.02<br>(24.16)  | 5.15<br>(2.8)      | -                    |
| <b>Aluminum, 25% in Bauxite (kg/functional unit)</b>                                | -                  | -                  | -                 | -                  | 2.53E-3<br>(2.47E-3) |
| <b>Intensive forest occupation (m<sup>2</sup>.year/functional unit)</b>             | -                  | -                  | 8.73<br>(13.1)    | 339.38<br>(169.69) | -                    |

Table S10 shows the GWP results of the sensitivity analysis for company A, where the number of reuses was changed.

Table S10 GWP results (in kg CO<sub>2</sub> eq/functional unit) of the sensitivity analysis for company A

|                   | Number of uses |        |        |        |       |       |        |        |       |        |
|-------------------|----------------|--------|--------|--------|-------|-------|--------|--------|-------|--------|
|                   | 1              | 2      | 3      | 4      | 5     | 6     | 7      | 8      | 9     | 10     |
| <b>Beach flag</b> | 41.59          | 23.82  | 18.07  | 15.33  | 13.79 | 12.85 | 12.26  | 11.88  | 11.64 | 11.51  |
| <b>Event tent</b> | 869.32         | 633.89 | 558.41 | 522.91 | 503.4 | 491.9 | 484.96 | 480.88 | 478.8 | 477.86 |

Table S11 shows the GWP results of the sensitivity analysis for company B, where the number of reuses was changed.

Table S11 GWP results (in kg CO<sub>2</sub> eq/functional unit) of the sensitivity analysis for company B

|                       | Number of repairs/lifetime |        |        |        |        |        |       |
|-----------------------|----------------------------|--------|--------|--------|--------|--------|-------|
|                       | 1                          | 2      | 3      | 4      | 5      | 34     | 35    |
| <b>Recycling bin</b>  | 121.02                     | 124.02 | 127.85 | 131.26 | 134.68 | 233.68 | 237.1 |
| <b>Storage locker</b> | 118.34                     | 141.73 | 165.12 | 188.5  | 211.89 | -      | -     |

Table S12 shows the GWP results of the sensitivity analysis for company C, where the number of door damages was changed.

*Table S12 GWP results (in kg CO<sub>2</sub> eq/functional unit) of the sensitivity analysis for company C*

|                 | Number of door changes |         |         |         |         |         |
|-----------------|------------------------|---------|---------|---------|---------|---------|
|                 | 0                      | 1       | 2       | 3       | 4       | 5       |
| <b>BAU</b>      | 2738.72                | 2754.68 | 2770.65 | 2786.61 | 2802.57 | 2818.53 |
| <b>Circular</b> | 2742.33                | 2744.34 | 2746.35 | 2748.36 | 2750.36 | 2752.37 |

## 6 Bibliography

Ecoinvent, 2016. ecoinvent 3.3. Retrieved from <https://www.ecoinvent.org/database/ecoinvent-33/ecoinvent-33.html>. (Accessed 5 October 2018).

ELCD, 2012. European Life Cycle Database. Retrieved from <http://eplca.jrc.ec.europa.eu/ELCD3/>. (Accessed 17 November 2017).

Gislaved-Folie-AB, 2018. Material Safety Data Sheet, 6009.

Roos, S., Sandin, G., Zamani, B., Peters, G., 2015. Environmental assessment of Swedish fashion consumption. Five garments—sustainable futures. Retrieved from <http://mistrafuturefashion.com/wp-content/uploads/2015/06/Environmental-assessment-of-Swedish-fashion-consumption-LCA.pdf>.
